# Supplementary material for: 500-thousand-year-old basal ice at Skytrain Ice Rise, West Antarctica, estimated with the 36 Cl/ 10 Be ratio
Source: Copernicus journal article supplement (doi:10.5194/egusphere-2025-1780), 2025-04-25
Supplement: Supplementary file 1 [file egusphere-2025-1780-supplement.pdf]

# 500-thousand-year-old basal ice at Skytrain Ice Rise, West Antarctica, estimated with the $^{36}\text{Cl}/^{10}\text{Be}$ ratio - supplementary information

Niklas Kappelt, Raimund Muscheler, Eric Wolff, Marcus Christl, Christof Vockenhuber

Figure S1 visualises the uncertainty of age estimates, which results from the measurement uncertainty of the  $\delta^{18}\text{O}$  detrended  $^{36}\text{Cl}/^{10}\text{Be}$  ratio (shown as vertical error bars) and the uncertainty of the present-day value, represented by the shaded area around the decay curve.

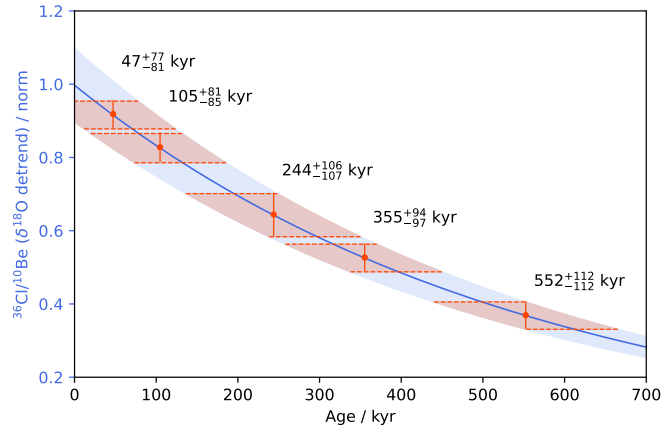

Figure S1: Age estimates for five deep samples of the Skytrain ice core based on the  $\delta^{18}\text{O}$  detrended  $^{36}\text{Cl}/^{10}\text{Be}$  ratio.

Figure S2 shows the  $\delta^{18}\text{O}$  detrended and decay corrected  $^{36}\text{Cl}$  concentration with a standard deviation of 17% of the mean. The resulting age estimates for deeper samples lack the production rate correction provided by  $^{10}\text{Be}$  concentrations and have larger uncertainties than estimates with the  $^{36}\text{Cl}/^{10}\text{Be}$  ratio, but suggest older ages for four out of five samples.

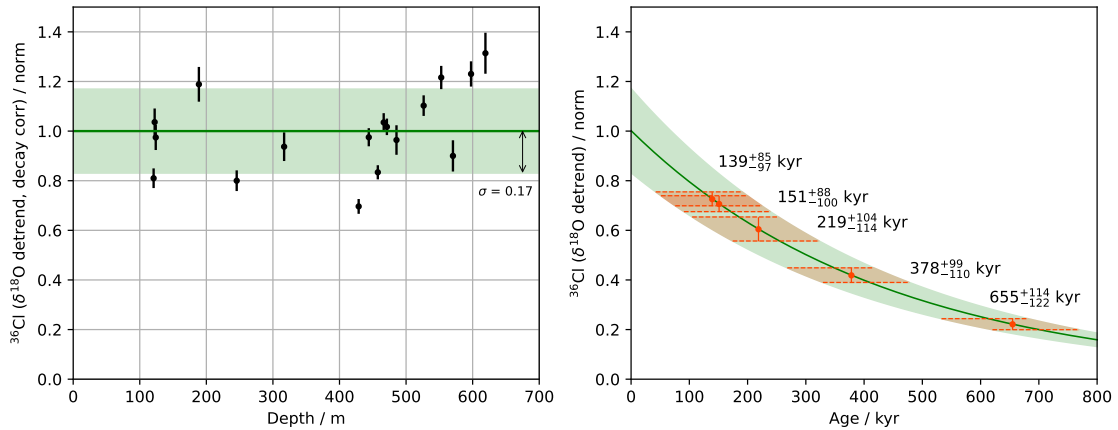

Figure S2: Age estimates for five deep samples of the Skytrain ice core based on the  $\delta^{18}\text{O}$  detrended  $^{36}\text{Cl}$  concentration.
