# Supplementary material for: 500-thousand-year-old basal ice at Skytrain Ice Rise, West Antarctica, estimated with the 36 Cl/ 10 Be ratio
Source: Copernicus journal article supplement (doi:10.5194/egusphere-2025-1780), 2025-04-25
Supplement: Supplementary file [file egusphere-2025-1780-AC1-supplement.pdf]

We would like to thank Dr Welten for his review and his overall positive evaluation. We address his feedback, shown in blue, with our comments in black.

I think the introduction could use a bit of historical perspective, since this method was first pioneered by Nishiizumi et al. (1983) for Antarctic ice from Allan Hills and then used by Elmore et al. (1987) for Greenland ice. Later measurements by Nishiizumi and Finkel (1998; Chinese Science Bull 43) showed that the  $^{36}\text{Cl}/^{10}\text{Be}$  ratio varies systematically between ice cores (e.g. GISP2 vs. Siple Dome), so the method has not become a standard application to date old ice.

Thank you for the suggestion, we agree that it will be a helpful addition to the introduction to inform the reader that this is not a standard dating method we apply, but that the paper should rather be seen as combination of method development and application. We will add: “The ratio was first suggested to be used as a dating tool by Nishiizumi et al. (1983) in Antarctica and by Elmore et al. (1987) in Greenland. However, due to its geospatial and temporal variability, it has not become a standard dating method. There are three processes that can cause its values in ice to deviate from the expected production rate ratio of 0.0875 (Poluianov 2016). [...] “

However, I would like to see a bit more discussion of the  $^{36}\text{Cl}/^{10}\text{Be}$  ages of the dated samples. For example, one sample in Fig. 2c (not sure what depth) has a  $^{36}\text{Cl}/^{10}\text{Be}$  ratio of ~0.19, what age would that correspond to? In fact, it would be illustrative to plot the  $^{36}\text{Cl}/^{10}\text{Be}$ -derived ages of all 18 samples in the top 620 m of the core in Figure 3, just to give a sense of how much the ages scatter – given the uncertainty of ~100 kyr in the ages of the deeper samples I would expect them to plot within ~200 kyr of their true age. This may also give some insight into how reliable the climate correction is.

This is a good idea and gives a good overview of the scatter in age estimates, highlighting also that the method is only suited for older samples. Plotting all calculated ages in the original Figure shows that the estimated age is actually in agreement with the established chronology for all but two samples, the ~0.19 one you have mentioned in your comment, at a depth of about 550m, and one of the youngest samples around a depth of 100m. Additionally, looking at the age discrepancy between the radionuclide age and the chronology, all but this one sample are also within 100 kyr of the actual age. While transparently emphasising the uncertainty of the method, the addition of this data to the Figure also provides additional confidence in its validity in our opinion, so we are happy to include it. The slightly different age estimates for the five deep samples compared to the original manuscript are related to the inclusion of the ice’s chlorine content, please see the answer to your comment about it further down.

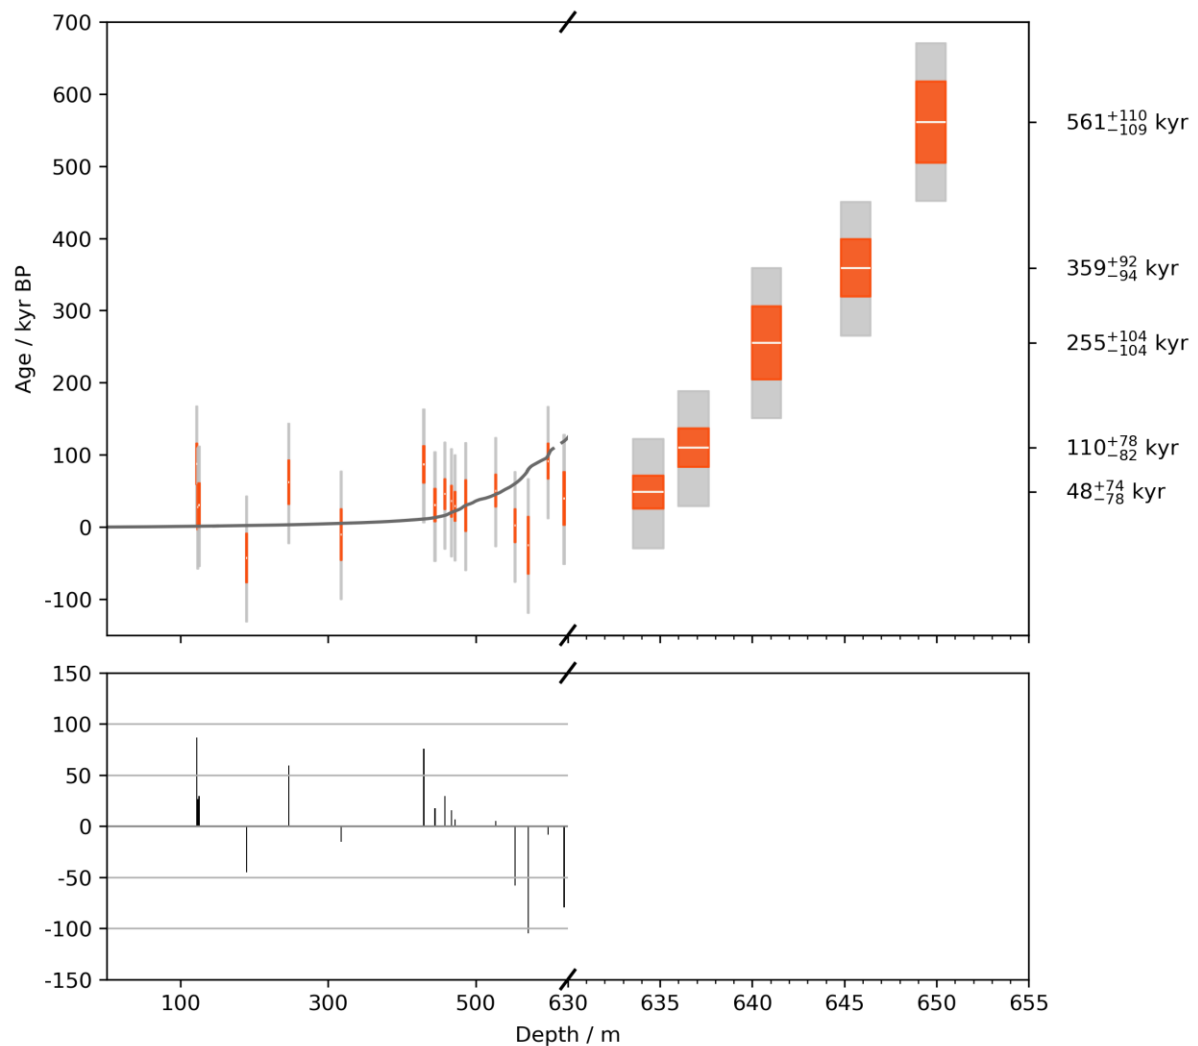

Figure 1: Estimated ages for all samples and deviation from the ST22 chronology for samples below 630 m depth.

Secondly, I would like to see a bit of discussion on the implications of this old ice at the bottom of the core. What does it mean to see a ~400 kyr increase in age over 24 m of ice thickness? I am not a glaciology expert, but I seem to remember from the WAIS Divide core that the projected age at the bottom of the core depended on the geothermal flux, i.e., more heating from the bottom means younger ice. So does the old ice imply a low geothermal flux and is this consistent with what we know about West Antarctica or is this beyond the scope of this paper?

The reason there is not old ice at WAIS Divide is that there is melting at the bed, which removed the old ice. As stated, this was caused by a relatively high geothermal heat flux (GHF), and a thick ice sheet acting as a thermal insulator. However, at Skytrain the bed temperature is -15 degrees (Table 1 of Mulvaney et al 2021), so that there is no melting at the bed. That doesn't necessarily reflect a low GHF but rather is because the ice is thin. This means that the ice is frozen to the bed and thins to the bed (in the simplest case conforming to a Nye model where vertical strain rate is constant with depth and vertical velocity and annual layer thickness reach zero at the bed, but in reality to a more

complex solution). In such models the age increases rapidly towards the bed, as seen at Skytrain. We will reference the bed temperature in our discussion and explain that a rapid age increase towards the bed can be expected at Skytrain.

L22 – Explain where the effective half-life of 384 kyr comes from. Audi et al. (2017) lists a half-life of 301 kyr for  $^{36}\text{Cl}$  and 1.51 Myr for  $^{10}\text{Be}$ , whereas the updated value of Chmeleff et al. (2010) is 1.387 Myr, so it is not clear which one was used. Later in the paper (L198) a value of 308 kyr is quoted for  $^{36}\text{Cl}$  or is that a typo?

Good point, we will specify that the half life of 301 kyr for  $^{36}\text{Cl}$  listed by Audi and the updated  $^{10}\text{Be}$  half life of 1.387 Myr by Chmeleff are used. The value in L198 is a typo, it will be corrected to 301 kyr.

L33-34. I'm sure the accumulation rate has varied in time, so may not always have been 13 g/cm<sup>2</sup>/yr. So even though  $^{36}\text{Cl}$  has not been lost in the past 100 yr, is it possible that it may have been lost in the past when precipitation was lower?

Indeed, the accumulation rate at many Antarctic drilling sites was about half of its present value in previous glacial times. Counter-intuitively, however, glacial conditions are more favourable towards chlorine preservation, as higher atmospheric concentrations of alkaline dust neutralised acidic species ( $\text{HNO}_3$ ,  $\text{H}_2\text{SO}_4$ ,  $\text{HCl}$ ). At low accumulation sites, like EPICA Dome C, both sea-salt chlorine and  $^{36}\text{Cl}$  were preserved, as we have explored in a previous publication (Quat Science Reviews, <https://doi.org/10.1016/j.quascirev.2025.109254>). We will include this information in the introduction.

L78. Was there a particular reason to add more Cl carrier to the deeper samples? Did the authors take the Cl component of the ice itself into account when converting  $^{36}\text{Cl}/\text{Cl}$  ratio to  $^{36}\text{Cl}$  concentration or is this contribution negligible compared to added carrier. If so, it would be useful to mention typical Cl concentration in Skytrain ice samples.

This is something we have overlooked. In our previous study with EDC ice, the contribution was negligible with natural chlorine concentrations of less than 1% of the added carrier mass. Here, however, we should include a correction, the average sample contains natural chloride with a weight of about 3.5% of the added carrier, due to the high sea-salt flux at this site. The correction modifies all data points and age estimates by a few percent, but does not affect our discussion of the data and the conclusions we draw. The correlations actually slightly improved and the standard deviation was further reduced from 0.10 to 0.09 for the detrended data.

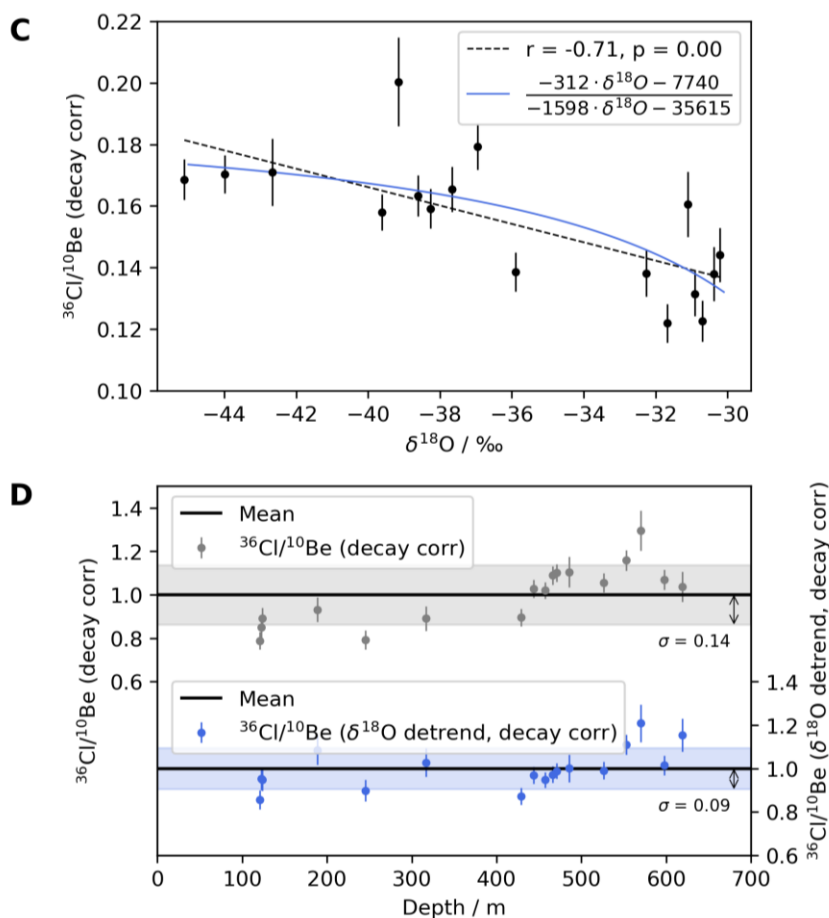

Figure 2: Updated data considering natural chlorine.

The shallower samples used to analyse the bomb-peak were smaller than the deeper samples, so that the data could be obtained with a resolution of 1 - 2 years. While the deeper samples use standard amounts of carrier, less carrier was added to the shallower samples, which are smaller in size and, therefore, contain fewer radionuclide atoms. To maintain good counting statistics, less carrier was added with the trade-off of more difficult sample handling.

[L198. Check  \$^{36}\text{Cl}\$  half-life – 301 kyr?](#)

See above, this is a typo and will be corrected to 301 kyr.
